# Supplementary material
Source: Royal Society of Chemistry journal article supplement (doi:10.1039/d6tc00190d)
Supplement: d6tc00190d2.pdf [file d6tc00190d2.pdf]

## Supporting Information

### **Efficient and Robust Manganese-Based Hybrid Ceramics Enabled by Dual-Ligand Regulation for High-Performance 3D X-ray Imaging**

Jiankun Xue<sup>a,c</sup>, Yaping Chen<sup>a,c</sup>, Hao Lu<sup>b\*</sup>, Chenrui Wang<sup>a</sup>, Lian Wang<sup>a,c</sup>, Guiqing Feng<sup>a,c</sup>, Xin Huang<sup>a</sup>, Yi Zheng<sup>a</sup>, Min Chen<sup>a</sup>, Xieming Xu<sup>a,b\*</sup>, Shuaihua Wang<sup>a,b</sup> and Shaofan Wu<sup>a</sup>

<sup>a</sup>Key Laboratory of Optoelectronic Materials Chemistry and Physics, Fujian Institute of Research on the Structure of Matter, Chinese Academy of Sciences, Fuzhou, 350002, PR China

<sup>b</sup>Fujian Science & Technology Innovation Laboratory for Optoelectronic Information of China, Fuzhou, 350108, PR China

<sup>c</sup>University of Chinese Academy of Sciences, Beijing, 100049, PR China.

E-mail: xuxieming@fjoel.cn

## **Experimental Section**

Materials: Methyl triphenyl bromophosphine (MTP, 99%) and benzyltrimethylammonium (BTAC) were purchased from Aladdin Company. Manganese bromide tetrahydrate ( $\text{MnBr}_2 \cdot 4\text{H}_2\text{O}$ ) was supplied by Acros Company. All reagents and chemicals were used as received without further purification.

### **Synthesis of single crystals**

Single crystals of  $(\text{MTP})_2\text{MnBr}_4$  and  $(\text{BTAC})_2\text{MnBr}_4$  were grown using the aqueous solution method. Under stirring conditions,  $\text{MnBr}_2 \cdot 4\text{H}_2\text{O}$  (0.5 mmol), MTP (1 mmol) and BTAC (1 mmol) were separately dissolved in 99.9% anhydrous ethanol (2 mL). For the growth of  $\text{MTP-BTACMnBr}_4$ ,  $\text{MnBr}_2 \cdot 4\text{H}_2\text{O}$  (0.5 mmol) and MTP (0.5 mmol), and BTAC (0.5 mmol) were dissolved together in 99.9% anhydrous ethanol (2 mL). After sealing pinholes with a thin film, the mixture was slowly evaporated at a constant temperature of  $60^\circ\text{C}$  in air for 4 days. Crystals of  $(\text{MTP})_2\text{MnBr}_4$ ,  $(\text{BTAC})_2\text{MnBr}_4$ , and  $\text{MTP-BTACMnBr}_4$  crystals gradually precipitated and were collected.

### **Preparation of mixed metal halide ceramics**

MHC were prepared by grinding organic ligands and manganese-based metal halides in a mortar under air conditions until uniform. The mixture was then transferred to a Petri dish and heated to  $130^\circ\text{C}$ . The melt was cooled to room temperature.

### **Fabrication of large-area MHC detectors**

$\text{MTP-BTACMnBr}_4$  scintillators are prepared by heating pre-fabricated ceramic precursors in an air atmosphere at temperatures between  $130$  and  $150^\circ\text{C}$  for 30 minutes, until they reach a molten state. Optically graded quartz plates are then heated at  $130^\circ\text{C}$  for 10 minutes. The molten ceramic precursor is then dispensed under controlled pressure onto an  $8\text{ cm} \times 8\text{ cm}$  quartz plate for one minute to ensure uniform distribution. Once cooled to room temperature, the assembly is encapsulated with UV adhesive to create a large-area  $\text{MTP-BTACMnBr}_4$  scintillation screen.

### **Material Characterization**

PXRD patterns were collected using a Rigaku Miniflex 600. Absorption spectra were obtained by a UV-Vis-NIR spectrophotometer (Lambda 950). The thermogravimetric curves were obtained by a simultaneous thermal analyzer (STA 449F3) under the N<sub>2</sub> atmosphere. Scanning electron microscope (SEM) images and EDS elemental maps were obtained using a Hitachi S4800 field emission scanning electron microscope.

### **X-ray Detection**

We used a tungsten anode X-ray tube (Moxtek TUB00146-W06) to produce continuous 30-50 kV X-ray with a maximum output power of 12 W, and use of 2 mm and 10 mm thick aluminum plates to further control the radiation dose rate. A Keithley Model 2450 source meter was utilized to supply bias and detection response currents. During the test, the tube voltage of the X-ray source is kept constant and the tube current is varied to adjust the X-ray dose rate.

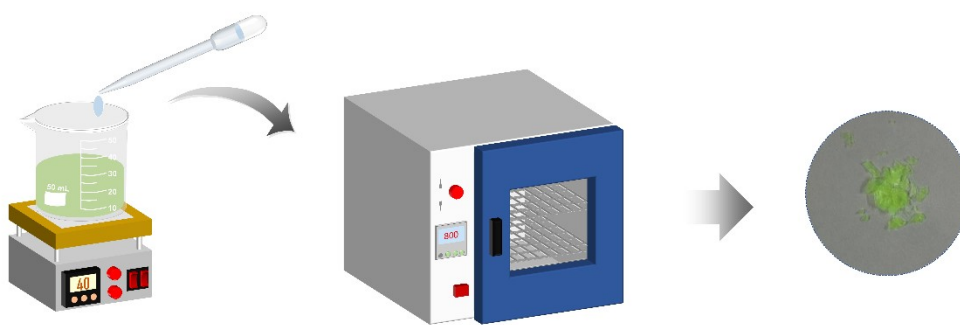

**Figure S1.** Schematic diagram of volatilization method

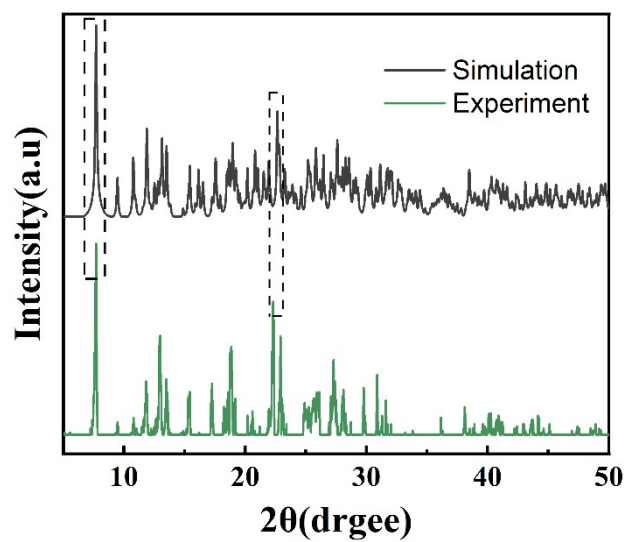

**Figure S2.** Characteristic analysis of XRD experiments and simulations for crystalline material MTP-BTACMnBr<sub>4</sub>.

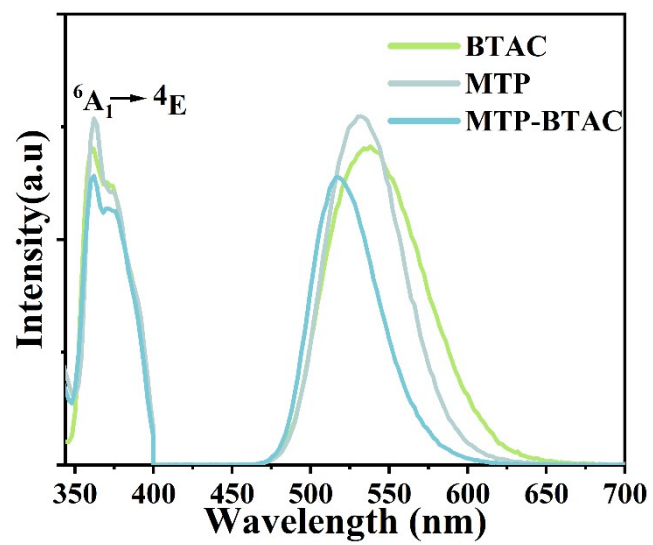

**Figure S3.** PL and PLE spectra of MTP-BTACMnBr<sub>4</sub>, (MTP)<sub>2</sub>MnBr<sub>4</sub>, and (BTAC)<sub>2</sub>MnBr<sub>4</sub>.

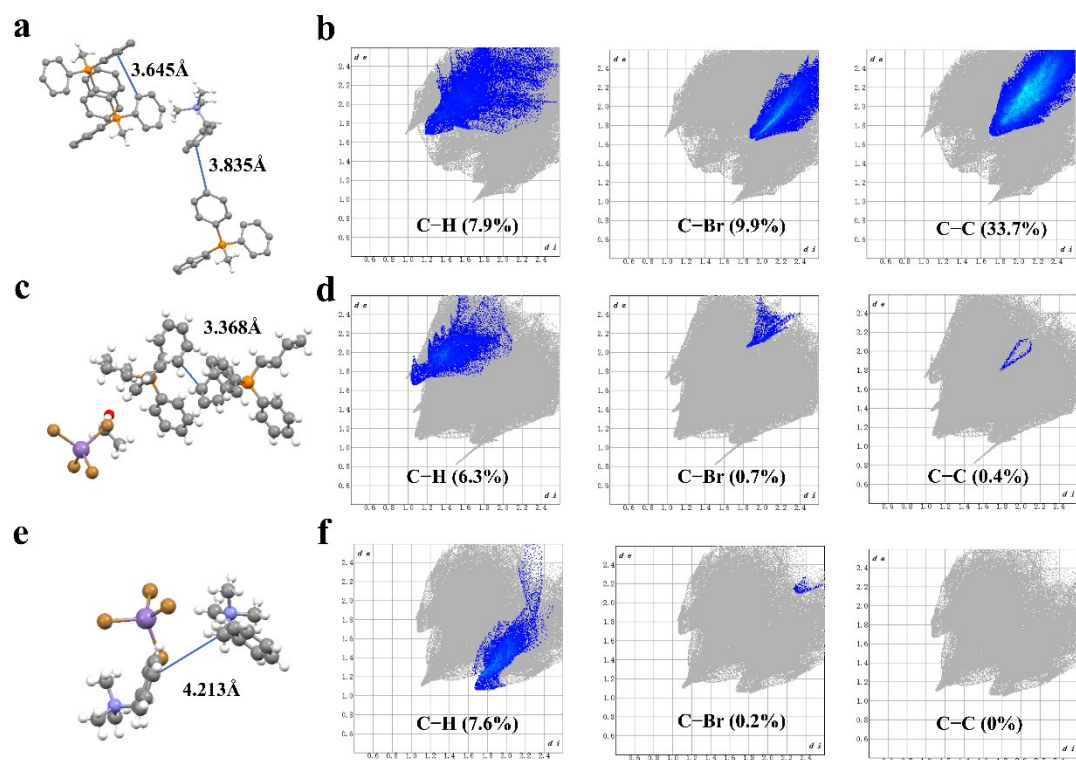

**Figure S4.** Hirschfeld surface-derived two-dimensional fingerprint plots.

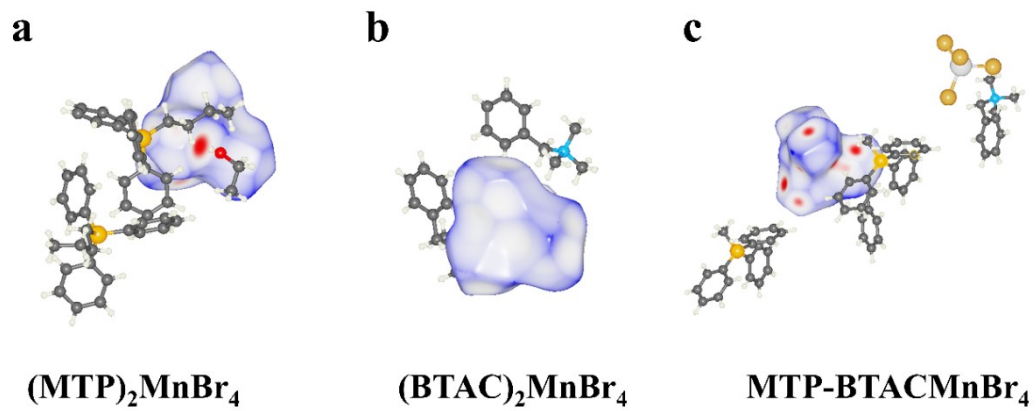

**Figure S5.** Distribution of forces surrounding  $[\text{MnBr}_4]^{2-}$  in three materials

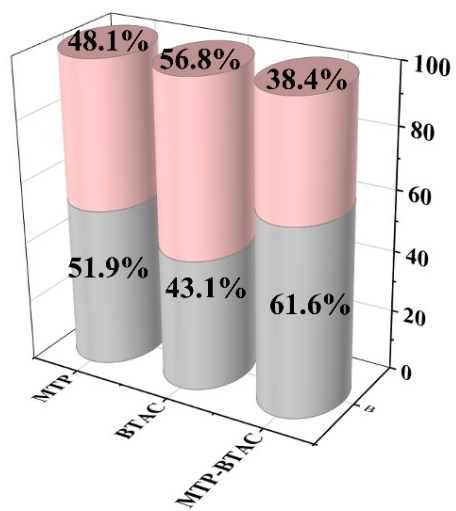

**Figure S6.** Free region and atom occupancy of these hybrid manganese bromides.

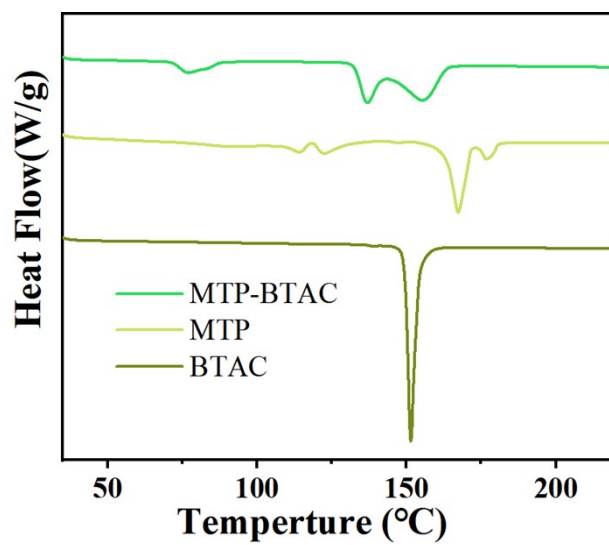

**Figure S7.** DSC curve of crystalline materials.

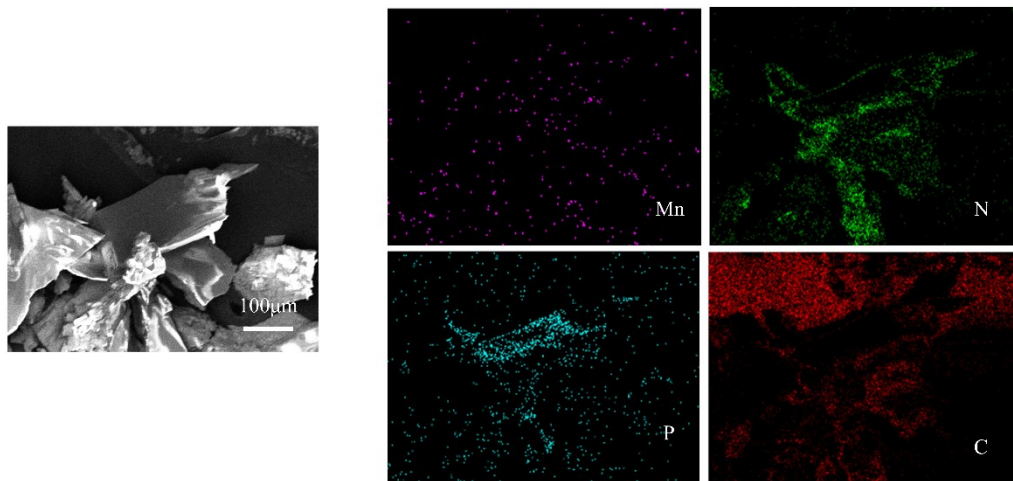

**Figure S8.** SEM images with elemental mappings of N, P, and Mn.

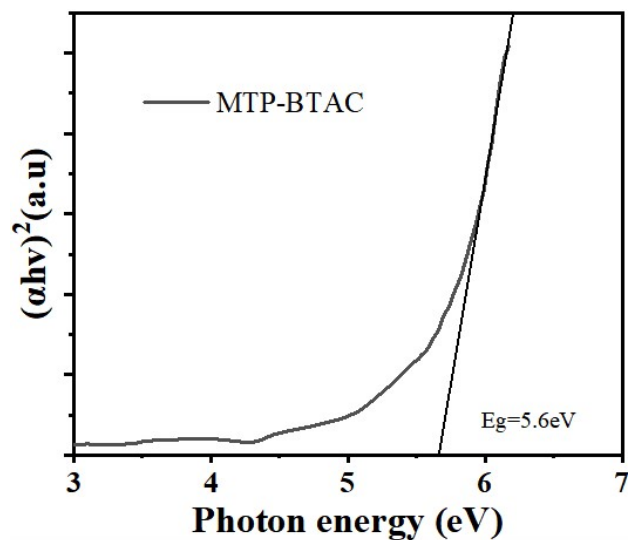

**Figure S9.** MTP-BTAC UV absorption spectrum.

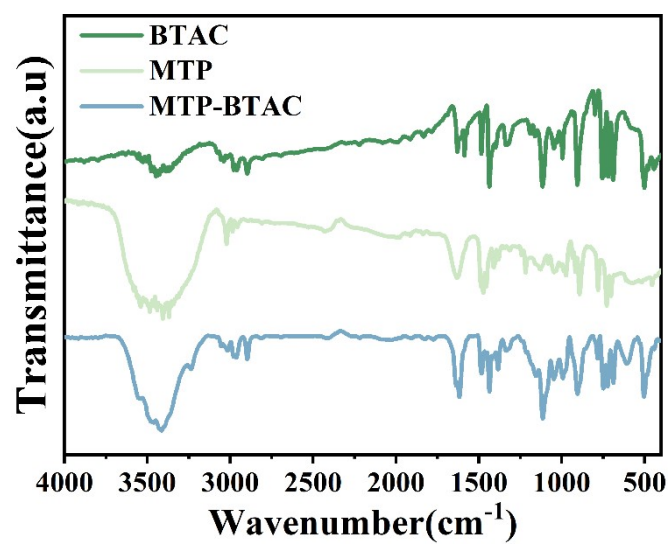

**Figure S10.** Infrared absorption spectra of  $\text{MTP-BTACMnBr}_4$ ,  $(\text{MTP})_2\text{MnBr}_4$ , and  $(\text{BTAC})_2\text{MnBr}_4$

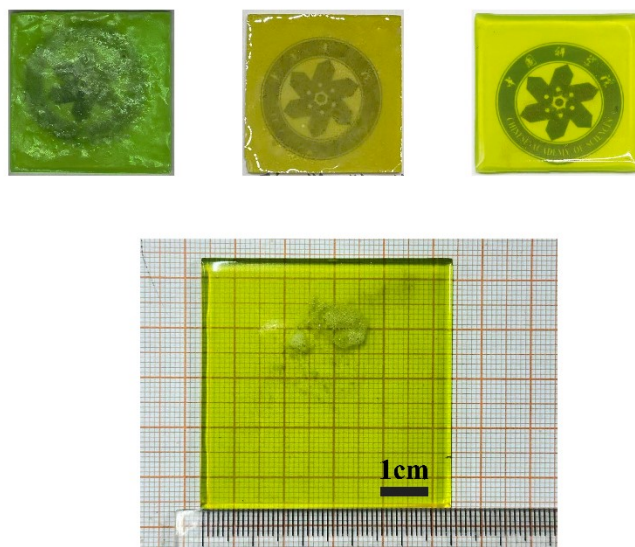

**Figure S11.** Physical Image of MHC Sample (From left to right:  $(\text{BTAC})_2\text{MnBr}_4$ ,  $(\text{MTP})_2\text{MnBr}_4$ ,  $\text{MTP-BTACMnBr}_4$ ).

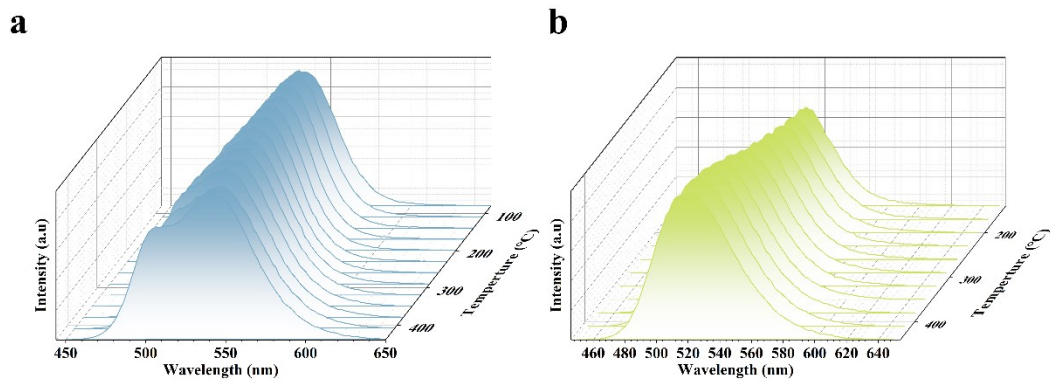

**Figure S12.** The variable temperature PL of  $(MTP)_2MnBr_4$  and  $(BTAC)_2MnBr_4$

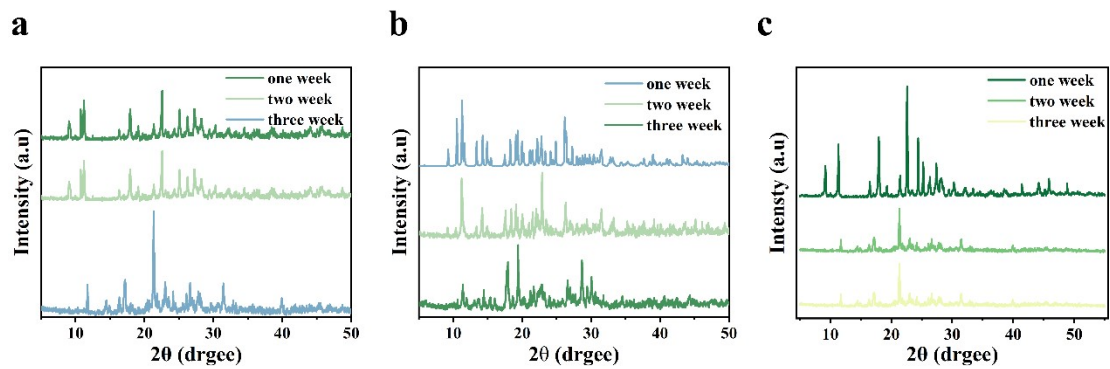

**Figure S13.** XRD patterns of materials at identical time intervals

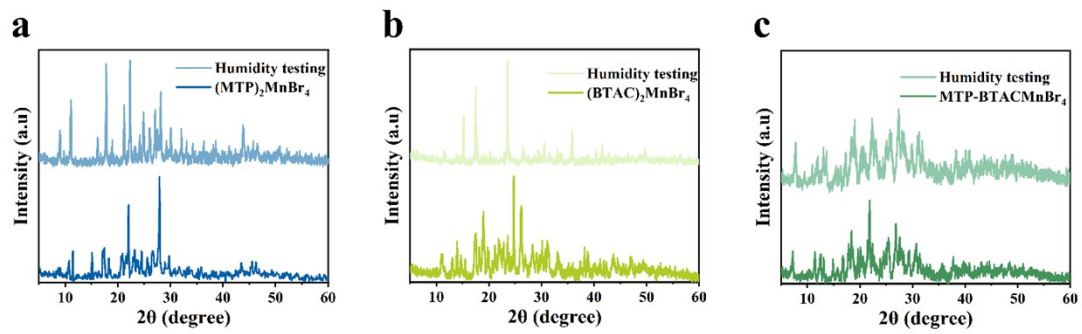

**Figure S14.** Comparison of XRD characterisation before and after humidity stabilisation for  $(\text{MTP})_2\text{MnBr}_4$ ,  $(\text{BTAC})_2\text{MnBr}_4$ , and MTP-BTAC  $\text{MnBr}_4$  from left to right.

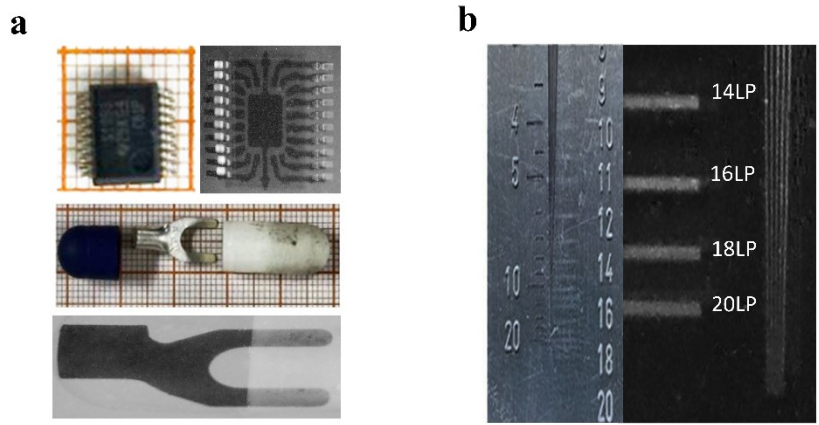

**Figure S15.** Two-dimensional imaging (a) electronic components (b) Line pair card.

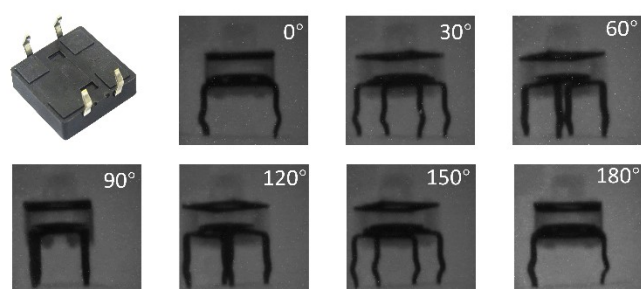

**Figure S16.** Schematic diagrams of the probe at different angles.

**Table S1.** Crystal data and structure refinement for the complex.

| Compound                                                     | MTP-BTACMnBr <sub>4</sub>                                          |
|--------------------------------------------------------------|--------------------------------------------------------------------|
| Empirical formula                                            | C <sub>29</sub> H <sub>30.64</sub> Br <sub>4</sub> MnNP            |
| Formula weight                                               | 798.73                                                             |
| Crystal system                                               | triclinic                                                          |
| Space group                                                  | <i>P</i> -1                                                        |
| <i>a</i> /Å                                                  | 9.5458(5)                                                          |
| <i>b</i> /Å                                                  | 12.0787(4)                                                         |
| <i>c</i> /Å                                                  | 14.7429(5)                                                         |
| $\alpha$ /°                                                  | 103.497(3)                                                         |
| $\beta$ /°                                                   | 94.609(4)                                                          |
| $\gamma$ /°                                                  | 94.559(4)                                                          |
| <i>V</i> /Å <sup>3</sup>                                     | 1639.09(12)                                                        |
| <i>Z</i>                                                     | 2                                                                  |
| $\rho$ /g·cm <sup>-3</sup>                                   | 1.618                                                              |
| Crystal size/mm <sup>3</sup>                                 | 0.44 × 0.23 × 0.16                                                 |
| $\mu$ (Gu-K $\alpha$ )/mm <sup>-1</sup>                      | 9.576                                                              |
| Data/restraints/parameters                                   | 6623/32/392                                                        |
| Goodness-of-fit on F <sup>2</sup>                            | 1.008                                                              |
| Reflections collected                                        | 20465                                                              |
| Independent reflections                                      | 6623                                                               |
| Final <i>R</i> indices [ <i>I</i> > 2 $\sigma$ ( <i>I</i> )] | <i>R</i> <sub>1</sub> = 0.0861<br>w <i>R</i> <sub>2</sub> = 0.2502 |
| <i>R</i> indices (all data)                                  | <i>R</i> <sub>1</sub> = 0.1221<br>w <i>R</i> <sub>2</sub> = 0.2988 |

**Table S2.** Rheological parameters for (MTP)<sub>2</sub>MnBr<sub>4</sub>, (BTAC)<sub>2</sub>MnBr<sub>4</sub>, MTP-BTACMnBr<sub>4</sub>.

| Compound                              | T <sub>m</sub> | η (T <sub>m</sub> ) | E <sub>a</sub>             |
|---------------------------------------|----------------|---------------------|----------------------------|
| MTP-BTACMnBr <sub>4</sub>             | 136°C          | 4.0 Pa·s            | 44.55 KJ·mol <sup>-1</sup> |
| (MTP) <sub>2</sub> MnBr <sub>4</sub>  | 167°C          | 4.6 Pa·s            | 21.07 KJ·mol <sup>-1</sup> |
| (BTAC) <sub>2</sub> MnBr <sub>4</sub> | 151°C          | 3.1 Pa·s            | 20.97 KJ·mol <sup>-1</sup> |

**Table S3** Comparison of Optical Properties of Different Materials

| Scintillators                                                                     | Light yield/MeV | Detection Limits        | Preparation Method |
|-----------------------------------------------------------------------------------|-----------------|-------------------------|--------------------|
| (ETP) <sub>2</sub> MnBr <sub>4</sub> <sup>[1]</sup>                               | 35000           | 103nGy·s <sup>-1</sup>  | Solution method    |
| (HTPP) <sub>2</sub> MnBr <sub>4</sub> <sup>[1]</sup>                              | 8600            | 185nGy·s <sup>-1</sup>  | Solution method    |
| (BTP) <sub>2</sub> MnBr <sub>4</sub> <sup>[2]</sup>                               | /               | 36.2nGy·s <sup>-1</sup> | Solution method    |
| (ETP) <sub>2</sub> SbCl <sub>5</sub> <sup>[3]</sup>                               | 8500            | /                       | Solution method    |
| BGO                                                                               | 8000            | 219nGy·s <sup>-1</sup>  | Tilting Method     |
| (C <sub>38</sub> H <sub>34</sub> P <sub>2</sub> )MnBr <sub>4</sub> <sup>[4]</sup> | 64000           | 89.4nGy·s <sup>-1</sup> | Solution method    |
| CsPbBr <sub>3</sub>                                                               | 10100           | 130nGy·s <sup>-1</sup>  | Solution method    |
| (MTP) <sub>2</sub> MnBr <sub>4</sub> <sup>[2]</sup>                               | 19771           | 213nGy·s <sup>-1</sup>  | Solution method    |
| (BTAC) <sub>2</sub> MnBr <sub>4</sub> <sup>[5]</sup>                              | 1741            | 1140nGy·s <sup>-1</sup> | Solution method    |
| MTP-BTACMnBr <sub>4</sub>                                                         | 23470           | 124nGy·s <sup>-1</sup>  | Solution method    |

## Reference

- [1] B. Li, Y. Xu, X. Zhang, K. Han, J. Jin, Z. Xia, *Adv. Opt. Mater.* 2022, 10,2102793.
- [2] B. Li, J. Jin, M. Yin, K. Han, Y. Zhang, X. Zhang, A. Zhang, Z. Xia, Y. Xu, *Chem. Sci.* 2023, 14, 12238.
- [3] M. Yin, B. Li, Z. Yi, Y. Zhang, Z. Xia, Y. Xu, *Chem. Commun.* 2023, 59,11361.
- [4] L. J. Xu, X. S. Lin, Q. Q. He, M. Worku and B. W. Ma, *Nat. Commun.*, 2020, 11.
- [5]. X. W. Cai, Y. Y. Zhao, H. Li, C. P. Huang and Z. Zhou, *J. Mol. Struct.*, 2018, 1161, 262-266.
